# Supplementary material
Source: publisher figshare collection journal article supplement (https://diabetesjournals.figshare.com/ndownloader/files/27913470)
Supplement: Supplementary file 1 [file 27913470]

**Nuclear factor Y in mouse pancreatic  $\beta$ -cells plays a crucial role in glucose homeostasis by  
regulating  $\beta$ -cell mass and insulin secretion**

Yin Liu<sup>†</sup>, Siyuan He<sup>†</sup>, Ruixue Zhou<sup>†</sup>, Xueping Zhang, Shanshan Yang, Dan Deng, Caixia Zhang,  
Xiaoqian Yu, Yulong Chen, Zhiguang Su\*

Molecular Medicine Research Center and National Clinical Research Center for Geriatrics, West  
China Hospital, and State Key Laboratory of Biotherapy, Sichuan University  
Chengdu 610041, China;

<sup>†</sup> These authors contributed equally to this work.

**Supplementary data consist of Supplementary Figures S1-7 and Tables S1-6.**

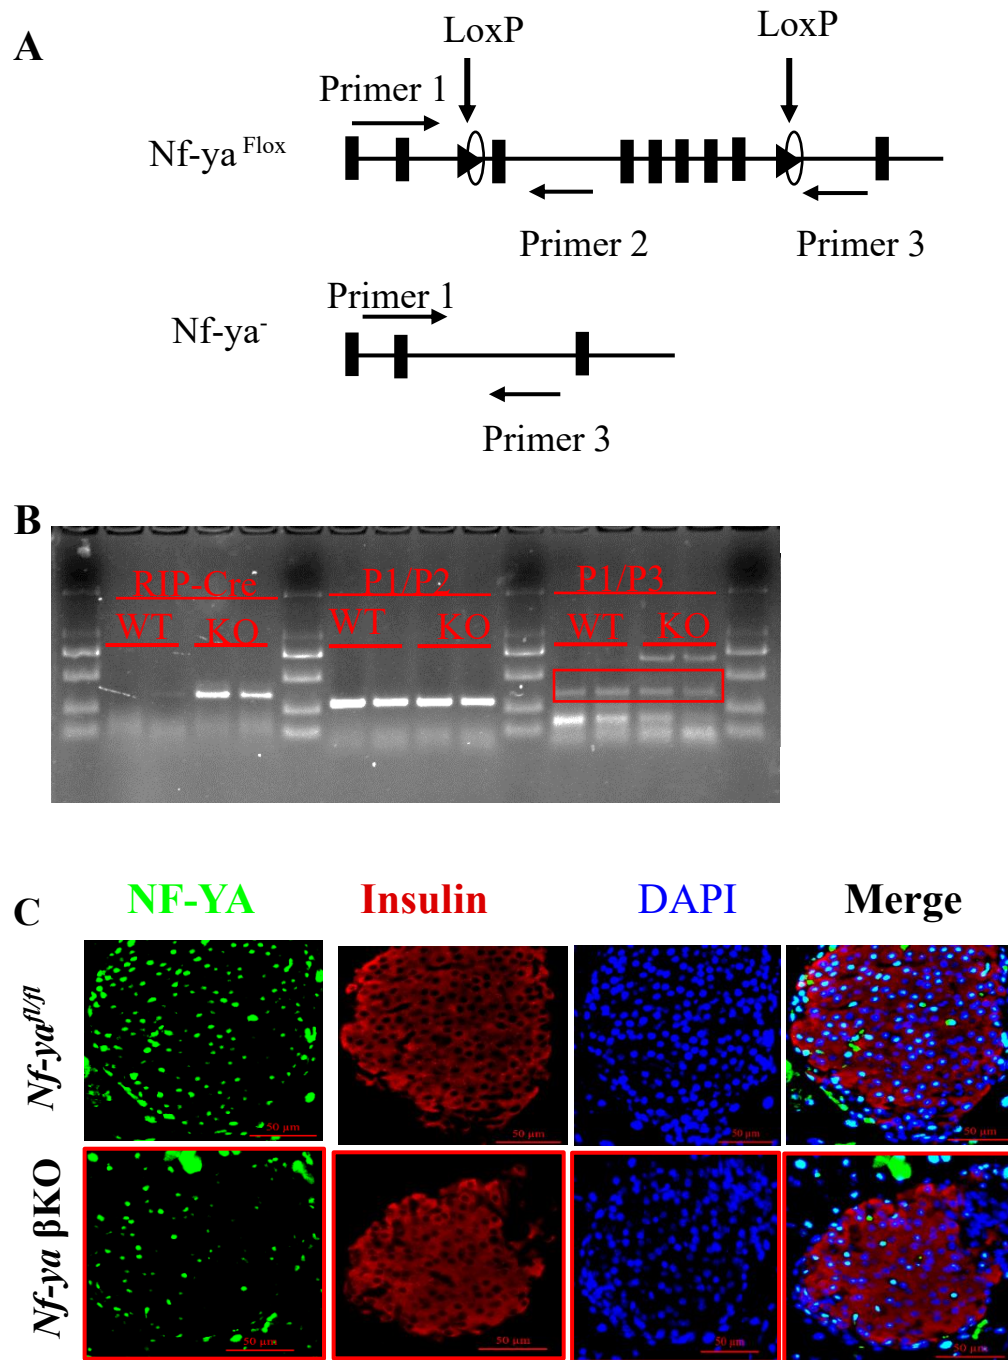

**Figure S1. Generation of  $\beta$  cell-specific *Nf-ya* KO (*Nf-ya*  $\beta$ KO) mice.** *Nf-ya*  $\beta$ KO mice were generated by crossing *Nf-ya* flox/flox mice with albumin-Cre transgenic mice, Cre-negative *Nf-ya* flox/flox animals were used as control. (A) Schematic diagram of the *Nf-ya* gene showing exons 3-8 flanked by two loxP sites indicated as triangles and the subsequent excision of exons 3-8 by Cre-mediated gene recombination. Vertical thick bars show relative locations of exons. (B) The genomic DNA extracted from the tails was used for PCR with primers detecting Cre, *Nf-ya* flox, *Nf-ya* WT or the deleted *Nf-ya*. (C)  $\beta$ -cells specific deletion of *Nf-ya* was confirmed using the immunofluorescent staining for NF-YA. Scale bars, 50 $\mu$ m.

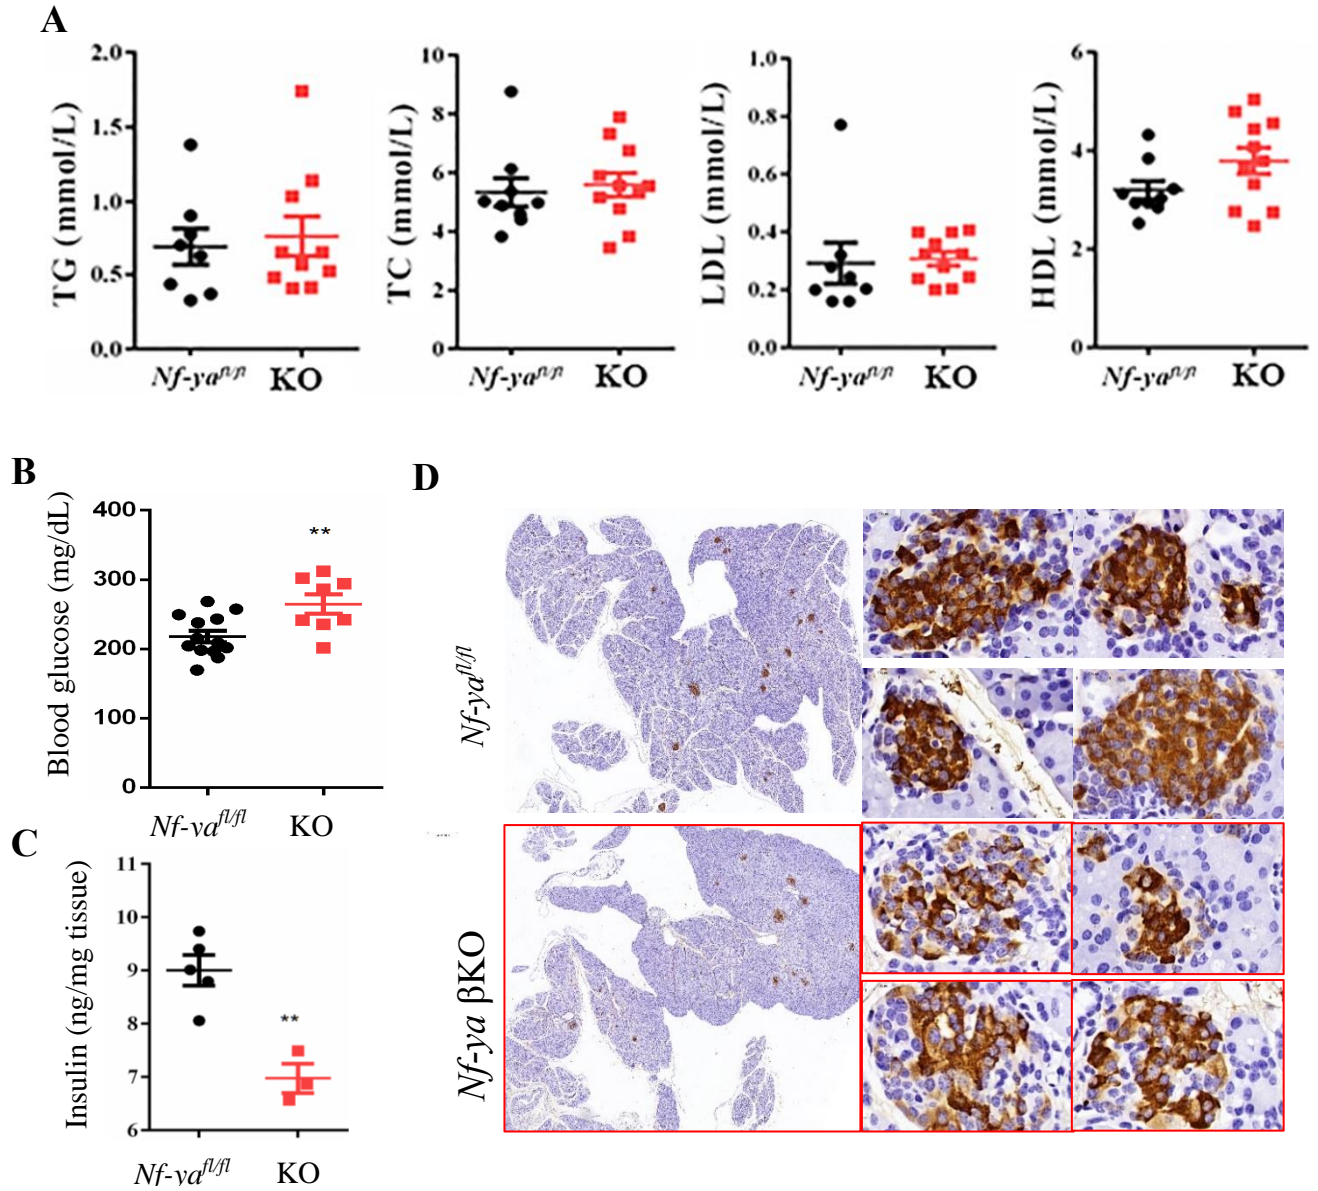

**Figure S2. Effects of  $\beta$ -cell-specific *Nf-ya* deletion on islets insulin content and plasma levels of glucose and lipids.** (A) Plasma lipids levels in 12-week-old male mice fed a normal chow diet (n=7-11 mice/group). (B-D) Plasma levels of glucose (B), pancreatic insulin contents (C), and immunohistochemical staining for insulin in pancreatic islets (D) in 2-week old mice (n = 12-15 mice per group). The data are means  $\pm$  SD.

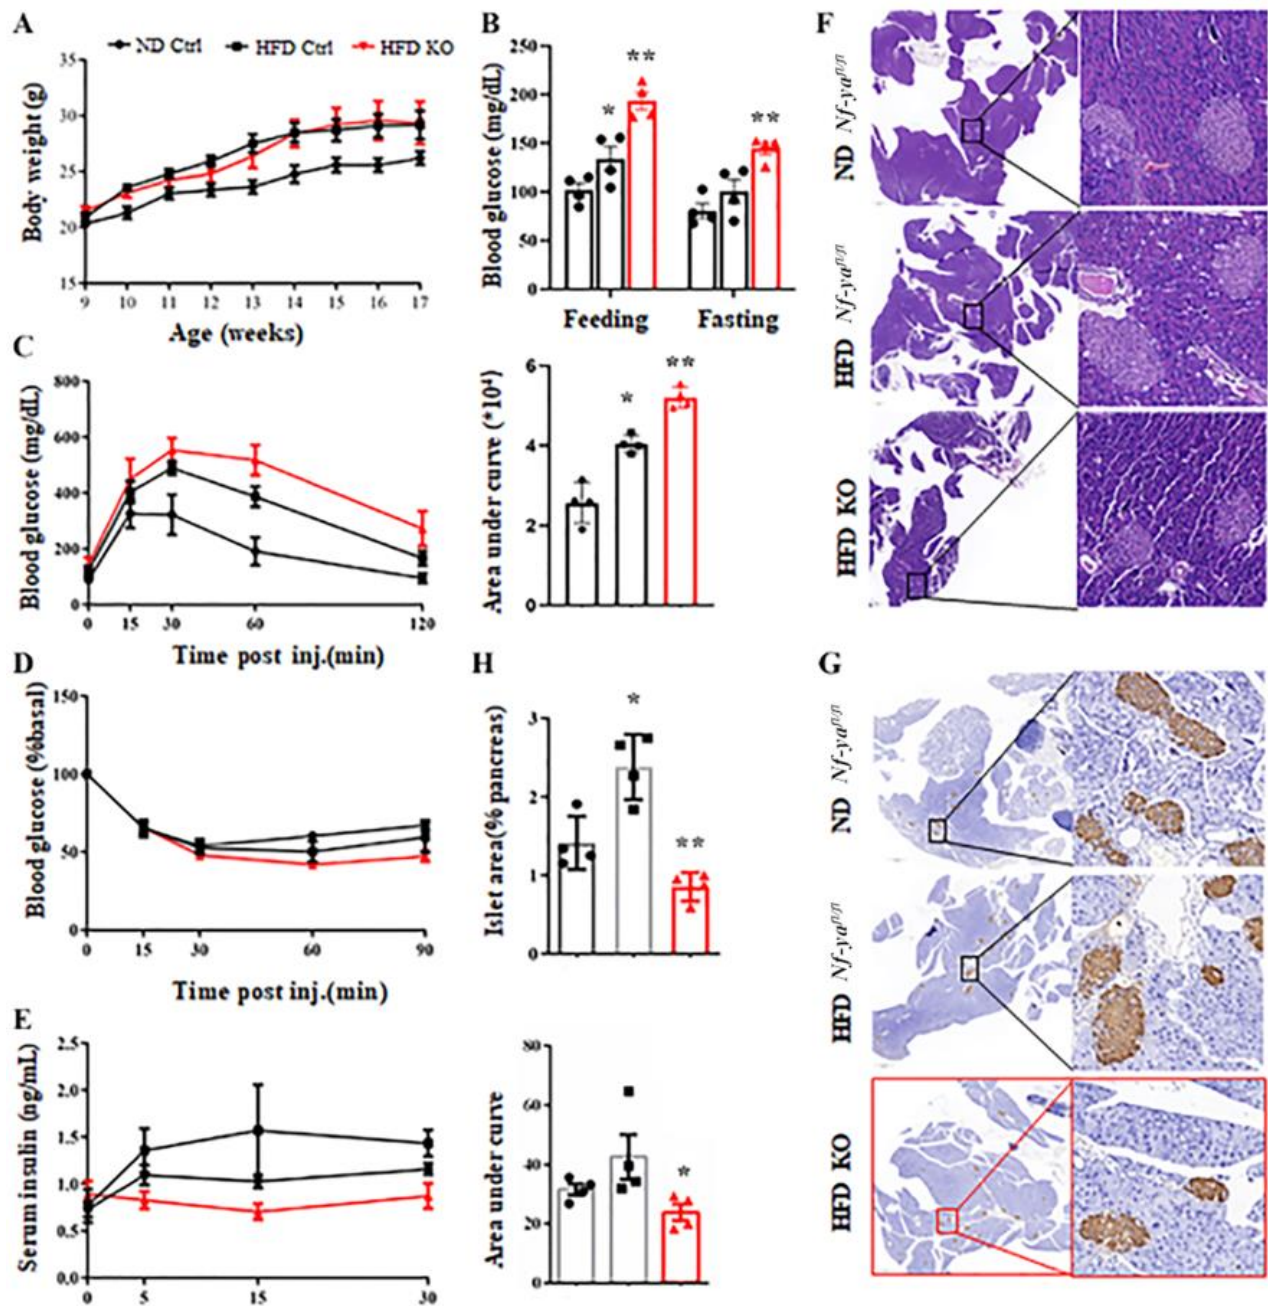

**Figure S3. *Nf-ya*  $\beta$ KO mice exhibited accelerated impaired glucose tolerance and diminished islets compensation to HFD.** Male mice of 8 weeks old were fed a normal chow diet (ND) or high fat diet (HFD) for 9 weeks, as marked. (A) Mice body weight was monitored over time (n = 4-5 mice per group). (B) Blood levels of glucose were examined in mice under either feeding states or 6-h fasting conditions (n = 4 for each group). (C) Plasma glucose concentrations (left) were measured at the designated time points during GTT in 12-h fasted mice given intraperitoneally glucose (2 g/kg body weight), and the areas under the curve (AUC) of GTT were calculated (right) (n = 4 for each group). (D) Plasma glucose concentrations were monitored at the designated time



points during ITT in 6-h fasted mice with the intraperitoneal injection of insulin (1 U/kg body weight) (n = 4 mice per group). (E) Plasma insulin concentrations (left) were measured at indicated time points during glucose-stimulated insulin secretion (GSIS) in response to administration of 3 g glucose/kg body weight in 12-h fasted mice, and AUC calculated from GSIS data were compared (right) (n = 4 mice per group). (F) Example H&E-stained pancreatic islets from ND-*Nf-ya*<sup>fl/fl</sup>, HFD-*Nf-ya*<sup>fl/fl</sup> and *Nf-ya* βKO HFD mice. The right-side panels (scale bars = 50 μm) show high-magnification images of the boxed areas in the left-side panels (scale bars = 500μm). (G) Example immunohistochemical staining for insulin (brown color) in pancreatic islets (H) Quantitative assessment of the islet area relative to the total pancreas. Each dot represents an individual mouse (n=4 mice per group). \**P* < 0.05, \*\**P* < 0.01 vs. ND- *Nf-ya*<sup>fl/fl</sup>.

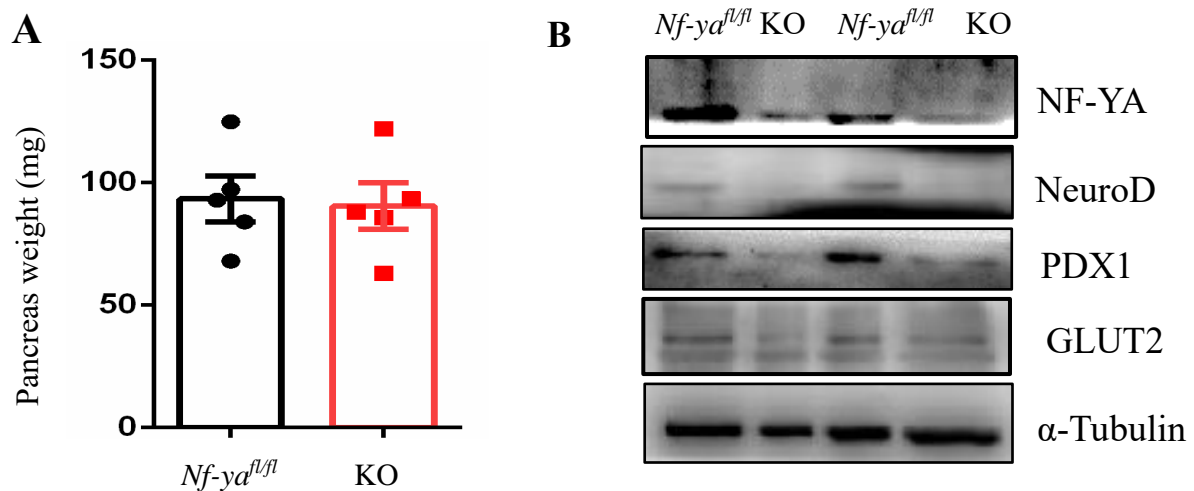

**Figure S4. Effects of *Nf-y* deletion in β-cells on pancreas weight (A) and the amount of islets proteins (B).** Pancreas tissues and islets were isolated from 12-week old mice fed a normal chow diet (n = 4-5 mice per group). The data are means ± SD.

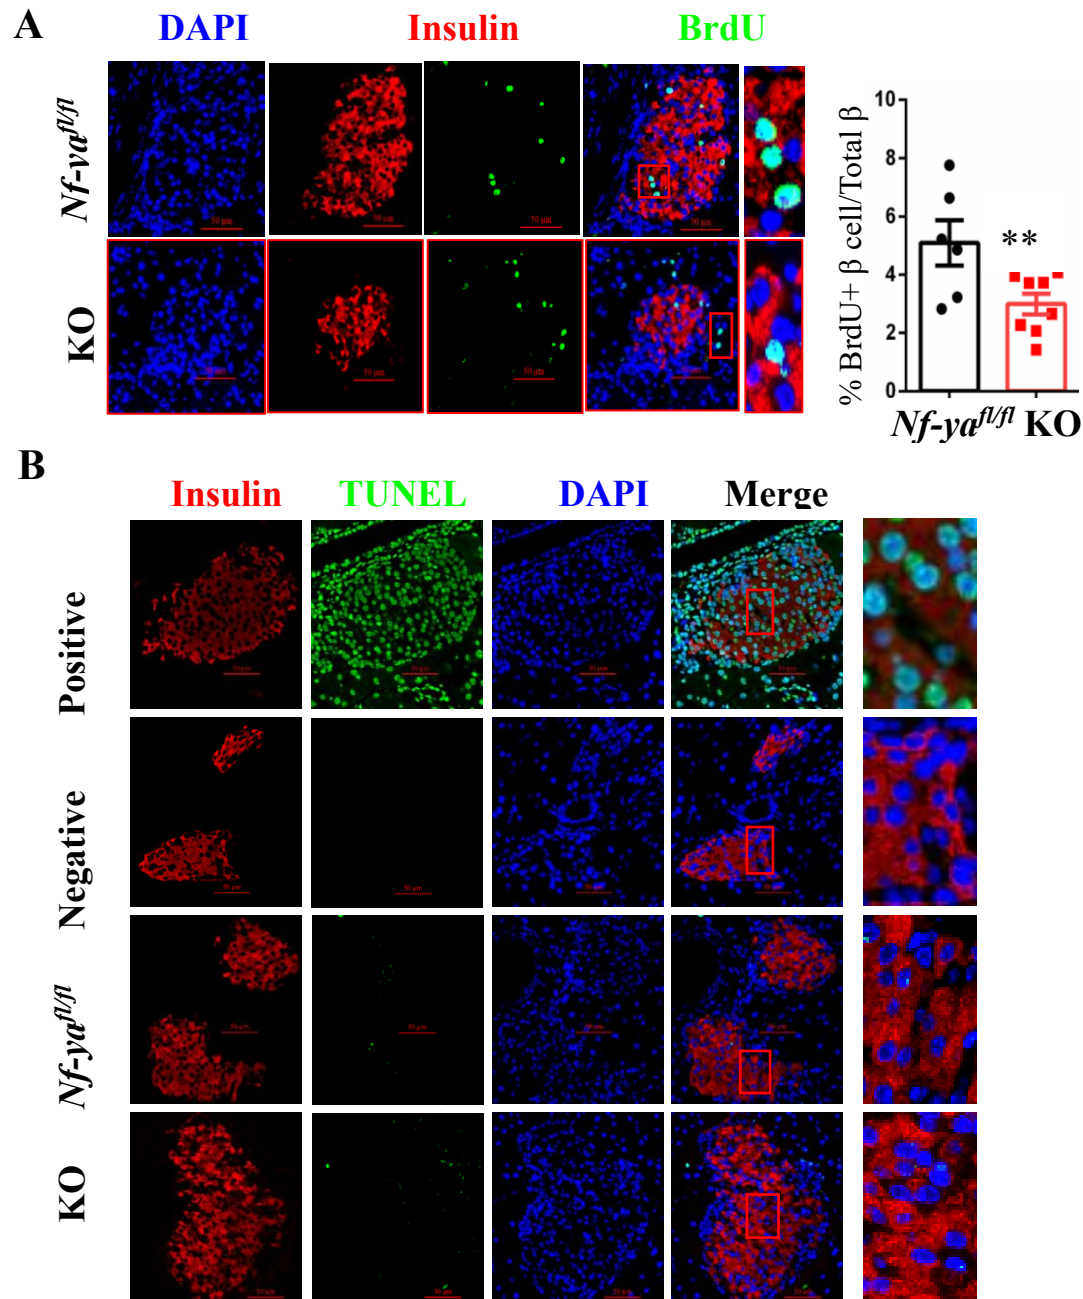

**Figure S5. Impacts of *Nf-y* deletion on the proliferation and apoptosis of pancreatic  $\beta$ -cells.** (A) BrdU labeling of pancreatic  $\beta$ -cells from 12-week old mice. Pancreatic sections stained for anti-insulin are shown in red, for anti-BrdU are shown in green, and for DAPI are shown in blue (left chart). Proliferation of  $\beta$ -cells was quantified as the number of nuclei from both BrdU and insulin positive cells divided by the number of nuclei from only insulin positive cells, multiplied by 100 (right chart). (B)  $\beta$ -cell apoptosis was measured by double staining of TUNEL and insulin and represented by percentage of double positives for TUNEL/insulin. TUNEL staining of pancreatic  $\beta$ -cells from 12-week old mice. Original magnification, X200.

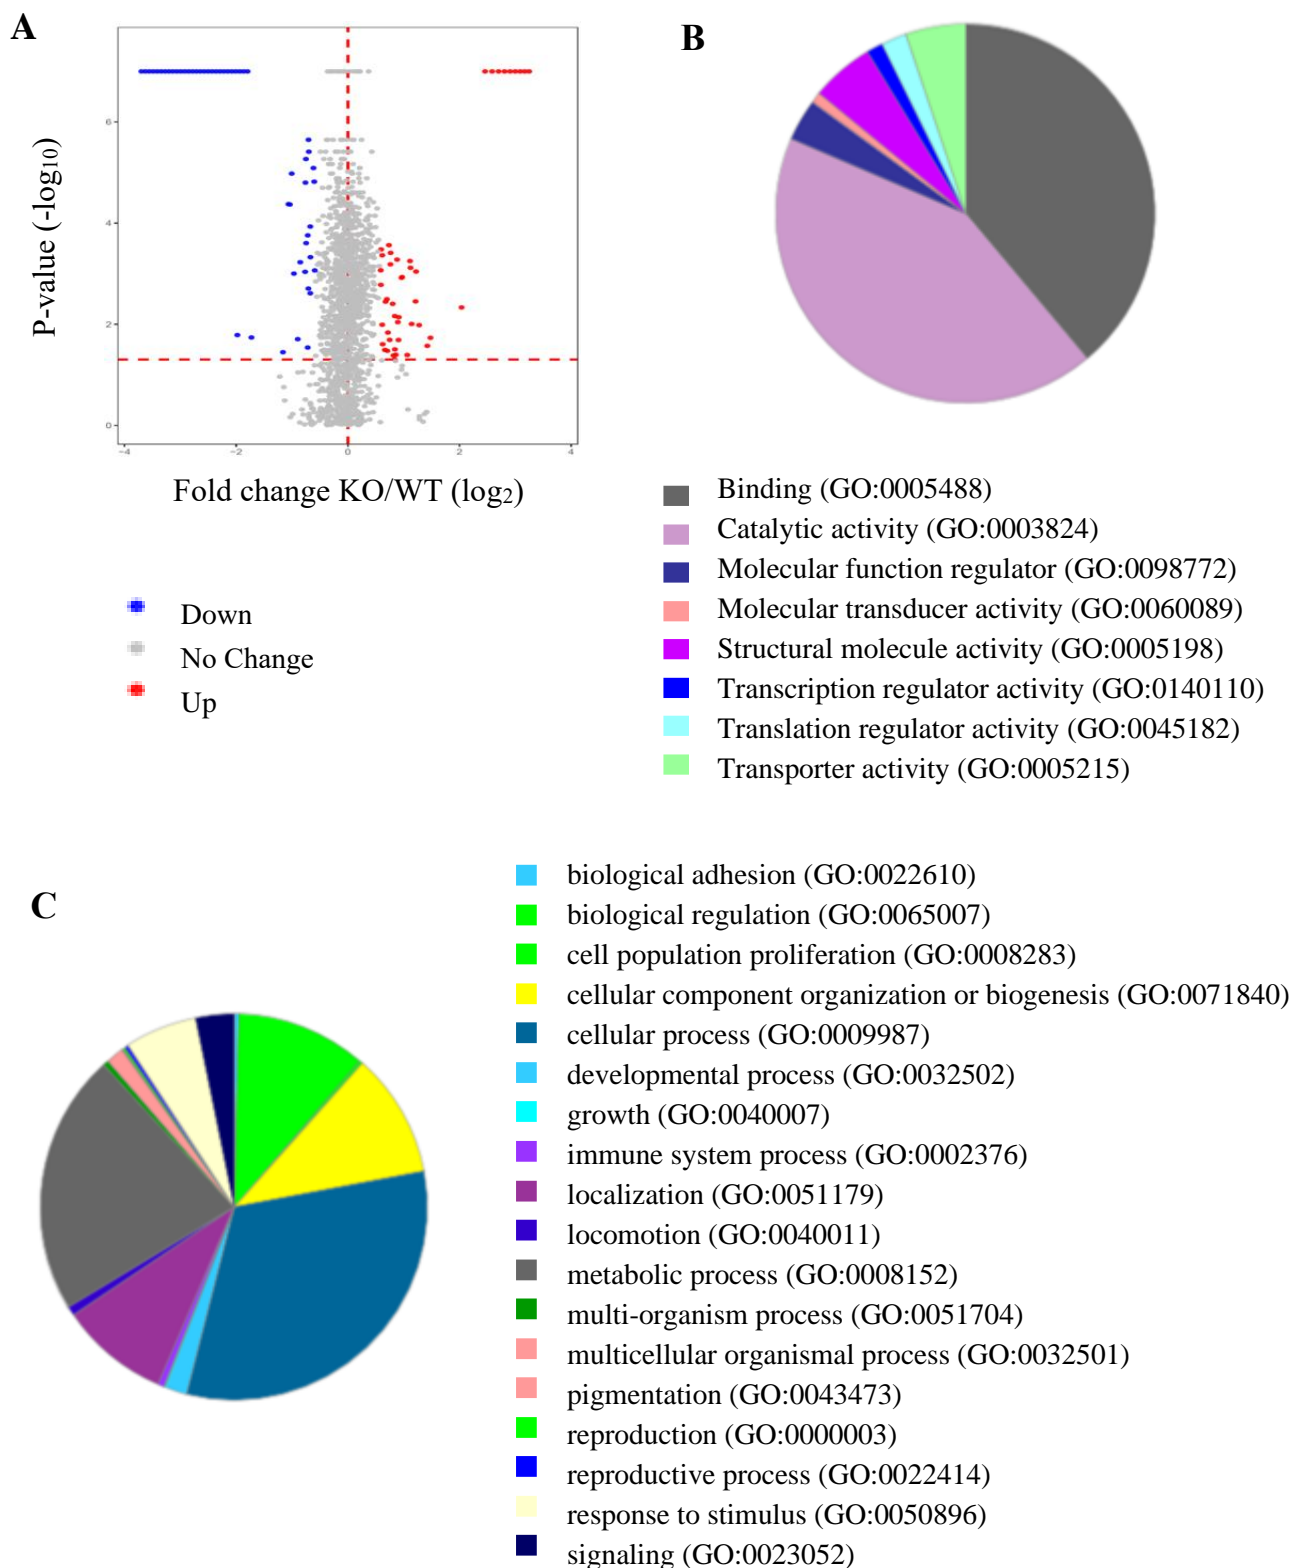

**Figure S6. Proteomics measures.** Islets proteomics was conducted using high-resolution mass spectrometry coupled with nano-flow liquid chromatography. Samples were quantified via Q Exactive Plus LCMS. (A) Among 1530 quantified proteins identified, 54 were down-regulated (blue)

and 46 were up-regulated red) in *Nf-ya*  $\beta$ KO mice as compared with the control mice. (B-C) The functional roles (B) and biologic processes (C) of the differentially abundant proteins were grouped by Gene Ontology (GO) terms.

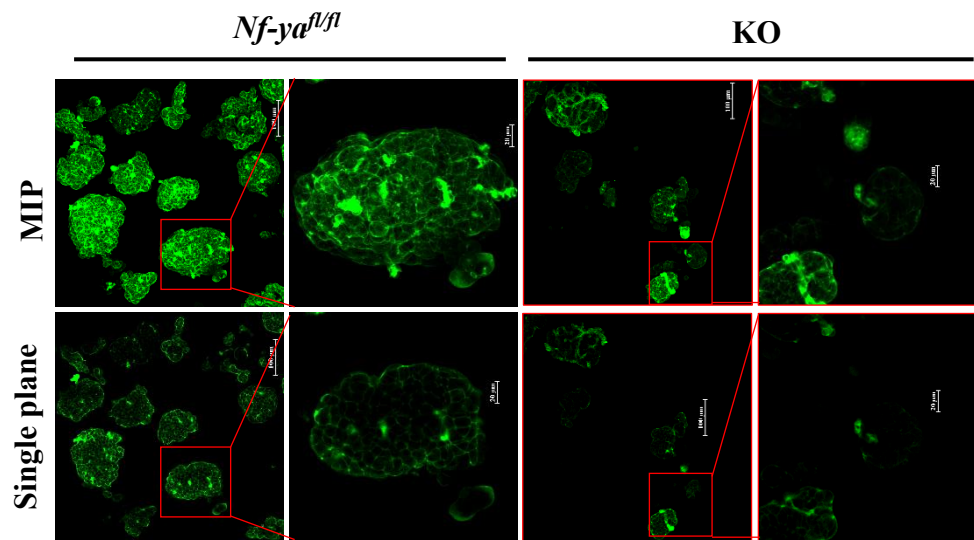

**Figure S7.** Imaging of F-actin detected by staining with Alexa Fluor 488-conjugated phalloidin in *Nf-ya*  $\beta$ KO and control pancreatic islets. Representative maximum intensity projection (MIP) of consecutive optical sections and single optical section (Single plane) of pancreatic islets (scale bars = 50  $\mu$ m).



**Table S1. Primers for mice genotyping**

| Gene  | Forward (5' to 3')   | Reverse (5' to 3')                                 |
|-------|----------------------|----------------------------------------------------|
| Cre   | ATTTGCCTGCATTACCGGTC | ATCAACGTTTTCTTTTCGG                                |
| Nf-ya | GTAAGTCAGGCTCCAGGG   | GGGTTGTCAGGATGTTTCGCAG<br>AGGCAAGGCAGATTTAGGAAGGTC |

**Table S2. Antibodies for immunostaining and protein blotting**

| Antibody                | company        | Cat.NO    |
|-------------------------|----------------|-----------|
| Anti-NF-YA              | Santa Cruz     | sc-17753  |
| Anti-NF-YB              | Zen-Bioscience | 507295    |
| Anti-NF-YC              | Zen-Bioscience | 509832    |
| Anti-Insulin            | HuaBio         | EM80714   |
| Anti-Glucagon           | HuaBio         | ET1702-20 |
| Anti-Ki67               | Abcame         | ab15580   |
| Anti-Brdu               | Abcame         | (ab6326)  |
| Anti-PCNA               | HuaBio         | ET1605-38 |
| Anti-CyclinD1           | HuaBio         | ET1601-31 |
| Anti-CyclinB1           | HuaBio         | ET1608-27 |
| Anti-NeuroD             | CST            | #2833     |
| Anti-PDX1               | CST            | #5679     |
| Anti-cl-caspase3        | CST            | #9661     |
| Anti-syntaxin3          | HuaBio         | ET7109-19 |
| Anti-Glut2              | Santa cruz     | sc-518022 |
| Anti-Ucp2               | ServiceBio     | GB11377   |
| Anti-pAKTs473           | CST            | #4060     |
| Anti- $\alpha$ -tubulin | HuaBio         | M1501-1   |

**Table S3. Primers for amplifying Glut2 upstream regions and Nf-y cDNAs**

| Gene     | Forward (5' to 3')                 | Reverse (5' to 3')                       |
|----------|------------------------------------|------------------------------------------|
| Glut2-P1 | <b>GAGCTC</b> GACACGTAAGCAGAATTC   | <b>AAGCTT</b> TGTGTGTGTGTGGAATTGTC<br>CT |
| Glut2-P2 | <b>GAGCTC</b> CATCTGGCTCCGCACTCTC  |                                          |
| Glut2-P3 | <b>GAGCTC</b> GGTAAAGGGTGTATTGATT  |                                          |
| Glut2-   | AGTCTCCA <b>g</b> TGCACAGCCTCCCCAG | GGCTGTGCA <b>c</b> TGGAGACTCACTGGAT      |
| Glut2-   | AAGCCACAAGTCA <b>c</b> TGGGGTAAAGG | TTACCCCA <b>g</b> TGACTTGTGGCTTGAGC      |
| Glut2-   | TAAAGGGTGTATTGA <b>c</b> TGGATTACC | TTGATGGTAATCCA <b>g</b> TCAATACACCC      |
| Nf-ya    | <b>GAATTC</b> GAGCAGTATACGACAAAC   | <b>TCTAGA</b> TTAGGAAACTCGGATGATC        |
| Nf-yb    | <b>GAATTC</b> GACAATGGACGGCGACAG   | <b>GGATCC</b> TCATGAAAAGTGAATTTGC        |
| Nf-yc    | <b>GAATTC</b> GTCCACAGAAGGAGGGTTT  | <b>TCTAGA</b> TCAGTCTCCAGTCACCTGGG       |

**Table S4. Primers used for real-time quantitative PCR analysis**

| Gene             | Forward (5' to 3')      | Reverse (5' to 3')      |
|------------------|-------------------------|-------------------------|
| <i>Cyclin D1</i> | ATGGAAGGACCCTTGAGGC     | CTTCACGGCTTGCTCGTTCT    |
| <i>Cyclin B1</i> | AAGGTGCCTGTGTGTGAACC    | GTCAGCCCCATCATCTGCG     |
| <i>Cyclin D2</i> | GAGTGGGAACCTGGTAGTGTTG  | CGCACAGAGCGATGAAGGT     |
| <i>Slc2a2</i>    | TCAGAAGACAAGATCACCGGA   | GCTGGTGTGACTGTAAGTGGG   |
| <i>Ucp2</i>      | ATGGTTGGTTTCAAGGCCACA   | CGGTATCCAGAGGGAAAGTGAT  |
| <i>Ppargc1a</i>  | TATGGAGTGACATAGAGTGTGC  | CCACTTCAATCCACCCAGAAAG  |
| <i>Nf-ya</i>     | GTCCAGACCCTCCAGGTAGT    | AGGCACCAACTGTATCTGCT    |
| <i>Ins1</i>      | CACTTCCTACCCCTGCTGG     | ACCACAAAGATGCTGTTTGACA  |
| <i>Ins2</i>      | GCTTCTTCTACACACCCATGTC  | AGCACTGATCTACAATGCCAC   |
| <i>Mafa</i>      | AGGAGGAGGTCATCCGACTG    | CTTCTCGCTCTCCAGAATGTG   |
| <i>Pdx1</i>      | CCCCAGTTTACAAGCTCGCT    | CTCGGTTCCATTCGGGAAAGG   |
| <i>Neurod1</i>   | AGAAGAAGAGGAGGAGGAGG    | TGACAGAGCCCAGATGTAG     |
| <i>Nd4</i>       | ACCATAGCCTTCTCACTATCAC  | TGGAGTTGGAGTTTAGGGAAGT  |
| <i>Nd6</i>       | GGTTAGCATTAAGCCTTCACC   | CATCAACCAATCTCCCAAACCA  |
| <i>as9</i>       | GTCCGCTTTTCGGGTTGTTAGA  | CCTCCTTTCCCGTGAGGTA     |
| <i>Cytb</i>      | GCCACCTTGACCCGATTCT     | TTGCTAGGGCCGCGATAAT     |
| <i>Cr1</i>       | AGACCCAGGTCAGCATCTTG    | GCCGATTCTTTGTTCCCTTGA   |
| <i>Cytc</i>      | CCAAATCTCCACGGTCTGTTC   | ATCAGGGTATCCTCTCCCCAG   |
| <i>Cox 1</i>     | TCGGAGCCCCAGATATAGCA    | TTCCGGCTAGAGGTGGGTA     |
| <i>Cox2</i>      | CATGAGCAGTCCCCTCCCTA    | TAACCCTGGTCGGTTTGATGT   |
| <i>Cox3</i>      | AAGGCCACCACACTCCTATT    | ATCATGTGTTGGTACGAGGCT   |
| <i>Cox4</i>      | ATTGGCAAGAGAGCCATTTCTA  | CACGCCGATCAGCGTAAGT     |
| <i>Cox5b</i>     | TTCAAGGTTACTTCGCGGAGT   | CGGGACTAGATTAGGGTCTTCC  |
| <i>Atpase6</i>   | AGGATTCCCAATCGTTGTAGCC  | CCTTTTGGTGTGTGGATTAGCA  |
| <i>Atp5a1</i>    | TCTCCATGCCTCTAACACTCG   | CCAGGTCAACAGACGTGTCAG   |
| <i>Atp5b</i>     | GGTTCATCCTGCCAGAGACTA   | AATCCCTCATCGAACTGGACG   |
| <i>Atp5c1</i>    | CCAGGAGACTGAAGTCCATCA   | AGAACCTGTCCCATACTACTCG  |
| <i>18s rRNA</i>  | CGCCGCTAGAGGTGCAATTC    | CCAGTCGGCATCGTTTATGG    |
| mtDNA            |                         |                         |
| <i>16S rRNA</i>  | CCGCAAGGGAAAGATGAAAGA   | TCGTTTGGTTTCGGGGTTTC    |
| Nuclear DNA      |                         |                         |
| <i>Nhk2</i>      | GCCAGCCTCTCCTGATTTTAGTG | GGGAACACAAAAGACCTCTTCTG |

**Table S5. Downregulated proteins in *Nf-ya*  $\beta$ KO islets as compared with *Nf-ya*<sup>fl/fl</sup> islets**

| Gene     | p.adjust | Fold<br>Change | Gene     | p.adjust | Fold<br>Change |
|----------|----------|----------------|----------|----------|----------------|
| Cul4b    | 1.00E-07 | 0.07           | Prdx4    | 1.00E-07 | 0.261          |
| Prdm16   | 1.00E-07 | 0.074          | Eftud2   | 1.00E-07 | 0.274          |
| Ddi2     | 1.00E-07 | 0.077          | RO60     | 1.00E-07 | 0.288          |
| Kiaa1324 | 1.00E-07 | 0.081          | Uba2     | 2.25E-06 | 0.614          |
| Ttn      | 1.00E-07 | 0.085          | Eif3g    | 3.87E-06 | 0.616          |
| Ttc38    | 1.00E-07 | 0.089          | Clic1    | 5.40E-06 | 0.595          |
| Cad      | 1.00E-07 | 0.094          | Bub3     | 8.14E-06 | 0.653          |
| Arxes2   | 1.00E-07 | 0.099          | Pmm2     | 1.05E-05 | 0.499          |
| Safb     | 1.00E-07 | 0.103          | Snx1     | 1.52E-05 | 0.659          |
| Pdia2    | 1.00E-07 | 0.109          | Vars     | 1.58E-05 | 0.591          |
| Gls      | 1.00E-07 | 0.114          | Psma5    | 4.22E-05 | 0.479          |
| Gcn1     | 1.00E-07 | 0.119          | Psma7    | 4.29E-05 | 0.487          |
| Numa1    | 1.00E-07 | 0.126          | Aifm1    | 0.000117 | 0.628          |
| Atp2b1   | 1.00E-07 | 0.132          | Atp6v0a1 | 0.000175 | 0.608          |
| Capn2    | 1.00E-07 | 0.139          | Ddx39b   | 0.000249 | 0.596          |
| Sec22b   | 1.00E-07 | 0.146          | Ap1m2    | 0.000472 | 0.629          |
| Dpysl2   | 1.00E-07 | 0.153          | Mtmr9    | 0.000594 | 0.554          |
| Gtpbp1   | 1.00E-07 | 0.160          | Arpc1b   | 0.000862 | 0.664          |
| Alyref   | 1.00E-07 | 0.169          | Uso1     | 0.00092  | 0.589          |
| Clta     | 1.00E-07 | 0.177          | Suc1g2   | 0.000997 | 0.512          |
| Stxbp1   | 1.00E-07 | 0.186          | Atp6v1c1 | 0.001972 | 0.614          |
| Metap2   | 1.00E-07 | 0.195          | Eif2s3x  | 0.002443 | 0.628          |
| Prdx6    | 1.00E-07 | 0.205          | Suc1g2   | 0.01637  | 0.254          |
| Dld      | 1.00E-07 | 0.2150         | Slc25a20 | 0.018286 | 0.3023         |
| Hsd17b10 | 1.00E-07 | 0.2258         | Letm1    | 0.019725 | 0.5372         |
| Dctn1    | 1.00E-07 | 0.2370         | Nfs1     | 0.028925 | 0.6081         |
| Prkcsh   | 1.00E-07 | 0.2489         | Hnrnpf   | 0.035721 | 0.4474         |

**Table S6. Upregulated proteins in *Nf-ya*  $\beta$ KO islets as compared with *Nf-ya*<sup>fl/fl</sup> islets**

| Gene      | p.adjust | Fold Change | Gene     | p.adjust | Fold Change |
|-----------|----------|-------------|----------|----------|-------------|
| Psmb1     | 1.00E-07 | 5.5         | Hnrnph1  | 0.003538 | 2.318       |
| Man2b1    | 1.00E-07 | 6           | Wdr1     | 0.003581 | 1.598       |
| Rpl21     | 1.00E-07 | 6.5         | Eif3d    | 0.003952 | 1.746       |
| Scarb2    | 1.00E-07 | 7           | Kpna3    | 0.004657 | 4.106       |
| Phb2      | 1.00E-07 | 7.5         | Dhx9     | 0.00691  | 1.793       |
| Psm4      | 1.00E-07 | 8           | Pgrmc1   | 0.007256 | 1.882       |
| Dhx15     | 1.00E-07 | 8.5         | Copb2    | 0.009088 | 1.861       |
| Purb      | 1.00E-07 | 9           | Api5     | 0.009886 | 2.209       |
| Srsf5     | 1.00E-07 | 9.5         | Ddc      | 0.010246 | 1.533       |
| Stx7      | 0.000273 | 1.667       | C1qbp    | 0.010414 | 2.426       |
| Cops4     | 0.000331 | 1.512       | Gnaz     | 0.014614 | 1.646       |
| Eef1b     | 0.000388 | 1.702       | Capn1    | 0.018553 | 2.790       |
| Ppt1      | 0.000433 | 1.535       | Psma3    | 0.020448 | 1.683       |
| Nipsnap2  | 0.000527 | 1.844       | Impa1    | 0.020508 | 1.876       |
| Timm44    | 0.000563 | 2.165       | Dync1i2  | 0.024874 | 1.542       |
| Nmt1      | 0.000654 | 1.697       | Anp32a   | 0.026774 | 2.685       |
| Bcat2     | 0.000765 | 2.1787      | Atp2a2   | 0.031422 | 1.794       |
| Hnrnpa2b1 | 0.000858 | 1.505       | Papss2   | 0.032181 | 1.585       |
| Nudc      | 0.000908 | 2.335       | Hsd17b12 | 0.033549 | 1.633       |
| Ap3d1     | 0.001169 | 1.963       | Septin7  | 0.040192 | 1.8138      |
| Asna1     | 0.001206 | 1.949       | Zw10     | 0.040679 | 2.092       |
| Cops6     | 0.001663 | 1.508       | Dpm1     | 0.041563 | 1.764       |
| Smpd2     | 0.003193 | 1.625       | Psmb5    | 0.049924 | 1.793       |
